# Supplementary material for: Detection and quantification of methane plumes with the MethaneAIR airborne spectrometer
Source: Copernicus journal article supplement (doi:10.5194/amt-18-3857-2025), 2025-08-14
Supplement: Supplementary file 1 [file amt-18-3857-2025-supplement.zip]

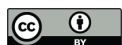

## *Supplement of*

# **Detection and quantification of methane plumes with the MethaneAIR airborne spectrometer**

**Luis Guanter et al.**

*Correspondence to:* Luis Guanter ([lguanter@edf.org](mailto:lguanter@edf.org))

- [amt-18-3857-2025-supplement-title-page.pdf](#)
- [egusphere-2024-3577-supplement-version1](#)
  - [Table\\_S1.csv](#)
  - [Table\\_S2.csv](#)

The copyright of individual parts of the supplement might differ from the article licence.
